# Supplementary material
Source: publisher figshare collection journal article supplement (https://tandf.figshare.com/articles/dataset/_/7346402)
Supplement: Supplementary file 1 [file 1]

# What is Engineering? What is Technology?

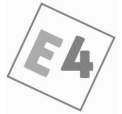

## Marking Instructions

- Use a No. 2 pencil or a blue or black ink pen only.
- Do not use pens with ink that soaks through the paper.
- Make solid marks that fill the response completely.

**CORRECT:**

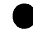

**INCORRECT:**

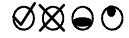

Name: \_\_\_\_\_ Date: \_\_\_\_\_

**Which of these describe Technology?  
Choose ALL that apply.**

- ☐ Must be a computer
- ☐ Must solve a problem
- ☐ Must be new or modern
- ☐ Must be a kind of power
- ☐ Must have parts that move
- ☐ Must be invented by people
- ☐ Must use electricity or power
- ☐ Must have a computer inside
- ☐ Must have a screen to look at
- ☐ Must be a thing you can touch

**Is Lightning a kind of technology?**

☐ Yes

☐ No

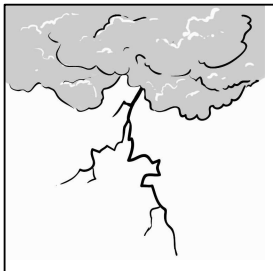

**Are these things that an engineer would do for his or her job? (YES or NO):**

|                                                          |                           |                          |
|----------------------------------------------------------|---------------------------|--------------------------|
| 1. Develop better bubble gum                             | <input type="radio"/> Yes | <input type="radio"/> No |
| 2. Steer ships                                           | <input type="radio"/> Yes | <input type="radio"/> No |
| 3. Install cable television                              | <input type="radio"/> Yes | <input type="radio"/> No |
| 4. Improve bandages                                      | <input type="radio"/> Yes | <input type="radio"/> No |
| 5. Draw diagrams of new technologies                     | <input type="radio"/> Yes | <input type="radio"/> No |
| 6. Fix headlights on cars                                | <input type="radio"/> Yes | <input type="radio"/> No |
| 7. Fly airplanes                                         | <input type="radio"/> Yes | <input type="radio"/> No |
| 8. Nail beams together for new houses                    | <input type="radio"/> Yes | <input type="radio"/> No |
| 9. Figure out how to package bottles so they don't break | <input type="radio"/> Yes | <input type="radio"/> No |
| 10. Drive trains                                         | <input type="radio"/> Yes | <input type="radio"/> No |
| 11. Come up with ways to keep soup hot for a picnic      | <input type="radio"/> Yes | <input type="radio"/> No |
| 12. Develop smaller cell phones                          | <input type="radio"/> Yes | <input type="radio"/> No |
| 13. Invent warmer kinds of cloth                         | <input type="radio"/> Yes | <input type="radio"/> No |
| 14. Drive motor boats                                    | <input type="radio"/> Yes | <input type="radio"/> No |
| 15. Operate cranes                                       | <input type="radio"/> Yes | <input type="radio"/> No |

PLEASE DO NOT WRITE IN THIS AREA

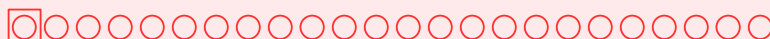

[SERIAL]

Are these things that an engineer would do for his or her job?  
(YES or NO):

|                                                                  |                                      |                          |
|------------------------------------------------------------------|--------------------------------------|--------------------------|
| 16. Improve camera lenses                                        | <input checked="" type="radio"/> Yes | <input type="radio"/> No |
| 17. Invent waterproof materials                                  | <input checked="" type="radio"/> Yes | <input type="radio"/> No |
| 18. Design tools for surgery                                     | <input checked="" type="radio"/> Yes | <input type="radio"/> No |
| 19. Improve a truck by putting new wheels on it                  | <input checked="" type="radio"/> Yes | <input type="radio"/> No |
| 20. Build chimneys out of bricks                                 | <input checked="" type="radio"/> Yes | <input type="radio"/> No |
| 21. Design ways to clean polluted air                            | <input checked="" type="radio"/> Yes | <input type="radio"/> No |
| 22. Drive garbage trucks                                         | <input checked="" type="radio"/> Yes | <input type="radio"/> No |
| 23. Figure out ways to explore the ocean                         | <input checked="" type="radio"/> Yes | <input type="radio"/> No |
| 24. Run machines for doctors and scientists                      | <input checked="" type="radio"/> Yes | <input type="radio"/> No |
| 25. Install wiring                                               | <input checked="" type="radio"/> Yes | <input type="radio"/> No |
| 26. Fix computers                                                | <input checked="" type="radio"/> Yes | <input type="radio"/> No |
| 27. Think about ways to clean the air                            | <input checked="" type="radio"/> Yes | <input type="radio"/> No |
| 28. Figure out what materials to use to make bridges             | <input checked="" type="radio"/> Yes | <input type="radio"/> No |
| 29. Put shelves together in a store                              | <input checked="" type="radio"/> Yes | <input type="radio"/> No |
| 30. Design smaller kinds of computers                            | <input checked="" type="radio"/> Yes | <input type="radio"/> No |
| 31. Drive racecars on a racetrack                                | <input checked="" type="radio"/> Yes | <input type="radio"/> No |
| 32. Pour cement for new roads                                    | <input checked="" type="radio"/> Yes | <input type="radio"/> No |
| 33. Measure how much weight materials can hold before they break | <input checked="" type="radio"/> Yes | <input type="radio"/> No |
| 34. Figure out how tall you can safely build towers              | <input checked="" type="radio"/> Yes | <input type="radio"/> No |
| 35. Cut glass to make windows in buildings                       | <input checked="" type="radio"/> Yes | <input type="radio"/> No |
| 36. Pack furniture into boxes in a factory                       | <input checked="" type="radio"/> Yes | <input type="radio"/> No |
| 37. Repair cars                                                  | <input checked="" type="radio"/> Yes | <input type="radio"/> No |

How important are each of the following activities to the work of an engineer?

|                                             | Not Important |   | Sort of Important |   | Very Important |
|---------------------------------------------|---------------|---|-------------------|---|----------------|
| 38. Using math                              | ①             | ① | ②                 | ③ | ④              |
| 39. Driving machines                        | ①             | ① | ②                 | ③ | ④              |
| 40. Using models                            | ①             | ① | ②                 | ③ | ④              |
| 41. Testing ideas                           | ①             | ① | ②                 | ③ | ④              |
| 42. Building houses                         | ①             | ① | ②                 | ③ | ④              |
| 43. Working as a team                       | ①             | ① | ②                 | ③ | ④              |
| 44. Doing experiments                       | ①             | ① | ②                 | ③ | ④              |
| 45. Solving problems                        | ①             | ① | ②                 | ③ | ④              |
| 46. Sketching ideas                         | ①             | ① | ②                 | ③ | ④              |
| 47. Repairing engines                       | ①             | ① | ②                 | ③ | ④              |
| 48. Using their creativity                  | ①             | ① | ②                 | ③ | ④              |
| 49. Understanding science                   | ①             | ① | ②                 | ③ | ④              |
| 50. Reading about inventions                | ①             | ① | ②                 | ③ | ④              |
| 51. Using power tools to fix things         | ①             | ① | ②                 | ③ | ④              |
| 52. Using power tools to build things       | ①             | ① | ②                 | ③ | ④              |
| 53. Writing down their ideas                | ①             | ① | ②                 | ③ | ④              |
| 54. Fixing broken things for other people   | ①             | ① | ②                 | ③ | ④              |
| 55. Writing reports for other engineers     | ①             | ① | ②                 | ③ | ④              |
| 56. Brainstorming different ideas           | ①             | ① | ②                 | ③ | ④              |
| 57. Driving people from place to place      | ①             | ① | ②                 | ③ | ④              |
| 58. Telling other people what they find out | ①             | ① | ②                 | ③ | ④              |

PLEASE DO NOT WRITE IN THIS AREA

[SERIAL]

53  
52  
51  
50  
49  
48  
47  
46  
45  
44  
43  
42  
41  
40  
39  
38  
37  
36  
35  
34  
33  
32  
31  
30  
29  
28  
27  
26  
25  
24  
23  
22  
21  
20  
19  
18  
17  
16  
15  
14  
13  
12  
11  
10  
9  
8  
7  
6  
5  
4  
3  
2  
1

Which of these are examples of technology?  
Choose all of the items that you think are technology.

|                                                                                                                                                                    |                                                                                                                                                                        |                                                                                                                                                                           |                                                                                                                                                                       |
|--------------------------------------------------------------------------------------------------------------------------------------------------------------------|------------------------------------------------------------------------------------------------------------------------------------------------------------------------|---------------------------------------------------------------------------------------------------------------------------------------------------------------------------|-----------------------------------------------------------------------------------------------------------------------------------------------------------------------|
|  <p><b>Wind-up Toy</b><br/><input type="radio"/> Yes <input type="radio"/> No</p> |  <p><b>Running Shoes</b><br/><input type="radio"/> Yes <input type="radio"/> No</p>   |  <p><b>Sandals</b><br/><input type="radio"/> Yes <input type="radio"/> No</p>           |  <p><b>Broom</b><br/><input type="radio"/> Yes <input type="radio"/> No</p>        |
|  <p><b>MP3 Player</b><br/><input type="radio"/> Yes <input type="radio"/> No</p>  |  <p><b>Volcano</b><br/><input type="radio"/> Yes <input type="radio"/> No</p>         |  <p><b>Piano</b><br/><input type="radio"/> Yes <input type="radio"/> No</p>             |  <p><b>Laptop</b><br/><input type="radio"/> Yes <input type="radio"/> No</p>       |
|  <p><b>Bird</b><br/><input type="radio"/> Yes <input type="radio"/> No</p>       |  <p><b>Windmill</b><br/><input type="radio"/> Yes <input type="radio"/> No</p>       |  <p><b>Keyboard</b><br/><input type="radio"/> Yes <input type="radio"/> No</p>         |  <p><b>Bonnet</b><br/><input type="radio"/> Yes <input type="radio"/> No</p>      |
|  <p><b>Bicycle</b><br/><input type="radio"/> Yes <input type="radio"/> No</p>   |  <p><b>Hand-held Fan</b><br/><input type="radio"/> Yes <input type="radio"/> No</p> |  <p><b>Roller Blades</b><br/><input type="radio"/> Yes <input type="radio"/> No</p>   |  <p><b>Basket</b><br/><input type="radio"/> Yes <input type="radio"/> No</p>     |
|  <p><b>Oak Tree</b><br/><input type="radio"/> Yes <input type="radio"/> No</p>  |  <p><b>Dandelion</b><br/><input type="radio"/> Yes <input type="radio"/> No</p>     |  <p><b>Game Controller</b><br/><input type="radio"/> Yes <input type="radio"/> No</p> |  <p><b>Cell Phone</b><br/><input type="radio"/> Yes <input type="radio"/> No</p> |
