# Supplementary material
Source: publisher figshare collection journal article supplement (https://tandf.figshare.com/articles/dataset/_/7346402)
Supplement: Supplementary file 2 [file 1]

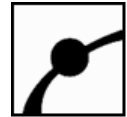

- 53
- 52
- 51
- 50
- 49
- 48
- 47
- 46
- 45
- 44
- 43
- 42
- 41
- 40
- 39
- 38
- 37
- 36
- 35
- 34
- 33
- 32
- 31
- 30
- 29
- 28
- 27
- 26
- 25
- 24
- 23
- 22
- 21
- 20
- 19
- 18
- 17
- 16
- 15
- 14
- 13
- 12
- 11
- 10
- 9
- 8
- 7
- 6
- 5
- 4
- 3
- 2
- 1

| My initials: |        |      |
|--------------|--------|------|
| FIRST        | MIDDLE | LAST |
| A            | A      | A    |
| B            | B      | B    |
| C            | C      | C    |
| D            | D      | D    |
| E            | E      | E    |
| F            | F      | F    |
| G            | G      | G    |
| H            | H      | H    |
| I            | I      | I    |
| J            | J      | J    |
| K            | K      | K    |
| L            | L      | L    |
| M            | M      | M    |
| N            | N      | N    |
| O            | O      | O    |
| P            | P      | P    |
| Q            | Q      | Q    |
| R            | R      | R    |
| S            | S      | S    |
| T            | T      | T    |
| U            | U      | U    |
| V            | V      | V    |
| W            | W      | W    |
| X            | X      | X    |
| Y            | Y      | Y    |
| Z            | Z      | Z    |

**I am a:**

☐ Girl

☐ Boy

**I was born in:**

MONTH BORN

- ☐ January
- ☐ February
- ☐ March
- ☐ April
- ☐ May
- ☐ June
- ☐ July
- ☐ August
- ☐ September
- ☐ October
- ☐ November
- ☐ December

**Today the date is:**

| MONTH                           | DAY | YEAR                       |
|---------------------------------|-----|----------------------------|
| <input type="radio"/> January   |     | <input type="radio"/> 2010 |
| <input type="radio"/> February  |     | <input type="radio"/> 2011 |
| <input type="radio"/> March     | 0   | <input type="radio"/> 2012 |
| <input type="radio"/> April     | 1   | <input type="radio"/> 2013 |
| <input type="radio"/> May       | 2   | <input type="radio"/> 2014 |
| <input type="radio"/> June      | 3   | <input type="radio"/> 2015 |
| <input type="radio"/> July      | 4   | <input type="radio"/> 2016 |
| <input type="radio"/> August    | 5   |                            |
| <input type="radio"/> September | 6   |                            |
| <input type="radio"/> October   | 7   |                            |
| <input type="radio"/> November  | 8   |                            |
| <input type="radio"/> December  | 9   |                            |

## Marking Instructions

- Use a No. 2 pencil or a blue or black ink pen only.
- Do not use pens with ink that soaks through the paper.
- Make solid marks that fill the response completely.
- Make no stray marks on this form.

**CORRECT:** ●

**INCORRECT:** ○ ✕ ⊖ ⊙

**What is Technology?**

**Please write your answer in the box below.**

**Is Lightning a kind of technology?**

☐ Yes

☐ No

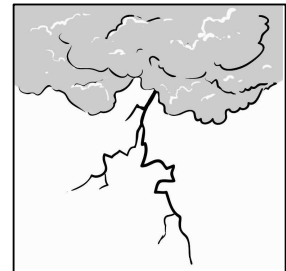

**Why or why not?**

**Please write your answer in the box below.**

PLEASE DO NOT WRITE IN THIS AREA

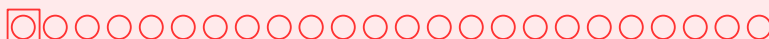

[SERIAL]

53  
52  
51  
50  
49  
48  
47  
46  
45  
44  
43  
42  
41  
40  
39  
38  
37  
36  
35  
34  
33  
32  
31  
30  
29  
28  
27  
26  
25  
24  
23  
22  
21  
20  
19  
18  
17  
16  
15  
14  
13  
12  
11  
10  
9  
8  
7  
6  
5  
4  
3  
2  
1

Which of these are examples of technology?  
Choose all of the items that you think are technology.

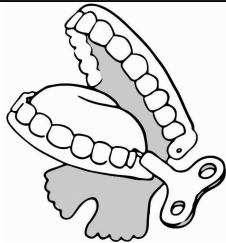

Wind-up Toy

☐ Yes ☐ No

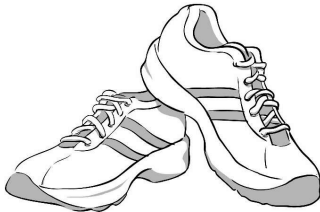

Running Shoes

☐ Yes ☐ No

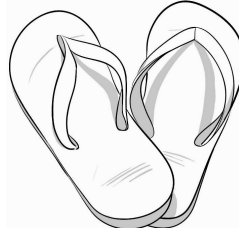

Sandals

☐ Yes ☐ No

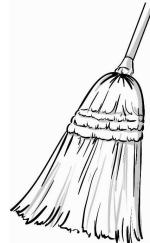

Broom

☐ Yes ☐ No

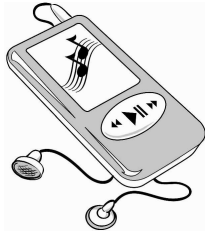

MP3 Player

☐ Yes ☐ No

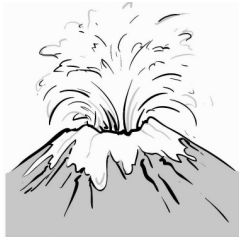

Volcano

☐ Yes ☐ No

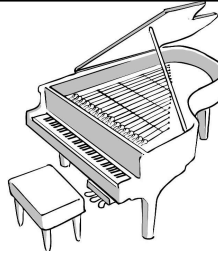

Piano

☐ Yes ☐ No

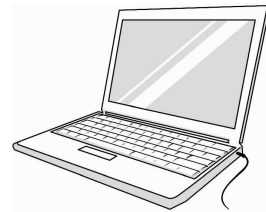

Laptop

☐ Yes ☐ No

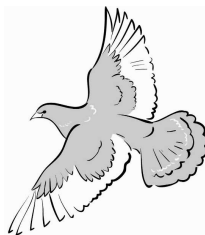

Bird

☐ Yes ☐ No

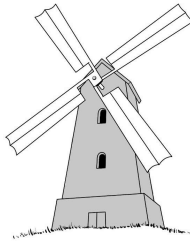

Windmill

☐ Yes ☐ No

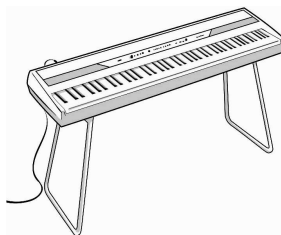

Keyboard

☐ Yes ☐ No

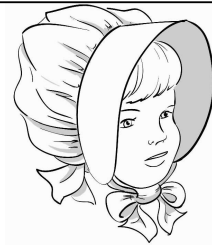

Bonnet

☐ Yes ☐ No

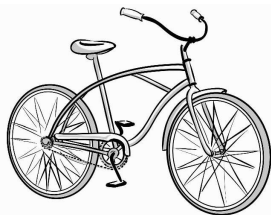

Bicycle

☐ Yes ☐ No

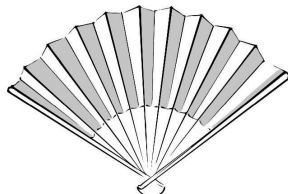

Hand-held Fan

☐ Yes ☐ No

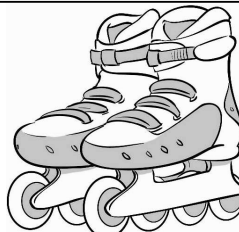

Roller Blades

☐ Yes ☐ No

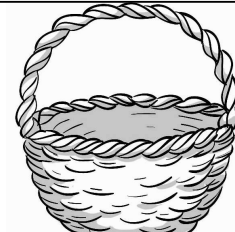

Basket

☐ Yes ☐ No

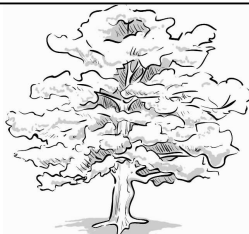

Oak Tree

☐ Yes ☐ No

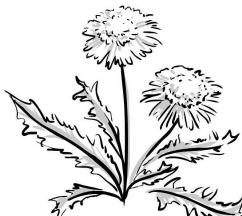

Dandelion

☐ Yes ☐ No

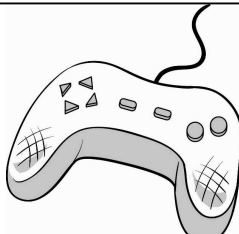

Game Controller

☐ Yes ☐ No

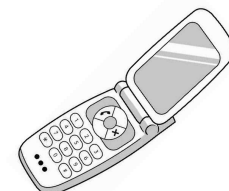

Cell Phone

☐ Yes ☐ No
